# Supplementary material for: Stabilizing oxygen-deficient Mn sites active in seawater oxidation
Source: Royal Society of Chemistry journal article supplement (doi:10.1039/d4ta00894d), 2024-01-01
Supplement: d4ta00894d1.pdf [file d4ta00894d1.pdf]

## Supporting Information

### Stabilizing Oxygen-Deficient Mn Sites Active in Seawater Oxidation

Tanveer ul Haq <sup>a\*</sup>, Mourad Smari <sup>b</sup>, Aleena Tahir <sup>c</sup>, and Yousef Haik <sup>d,e\*</sup>

<sup>a</sup> Department of Chemistry, College of Sciences, University of Sharjah, P.O. Box, 27272 Sharjah, UAE

<sup>b</sup> Center for Advanced Materials Research, Research Institute of Sciences and Engineering, University of Sharjah, P. O. Box 27272, Sharjah, United Arab Emirates.

<sup>c</sup> Department of Chemistry & Chemical Engineering, SBA School of Science & Engineering, Lahore University of Management Sciences (LUMS), DHA, Lahore, Pakistan

<sup>d</sup> Department of Mechanical and Nuclear Engineering, College of Engineering, University of Sharjah, P.O. Box, 27272 Sharjah, UAE

<sup>e</sup> Department of Mechanical Engineering, The University of Jordan, Amman-Jordan

Corresponding Emails:

[yhaik@sharjah.ac.ae](mailto:yhaik@sharjah.ac.ae)

[thaq@sharjah.ac.ae](mailto:thaq@sharjah.ac.ae)

## Materials

Ni Foam (0.25 mm, Sigma Aldrich), Calcium nitrate hydrate, ( $\text{Ca}(\text{NO}_3)_2 \cdot 4\text{H}_2\text{O}$ , 99%, Sigma Aldrich), Manganese chloride hydrate ( $\text{MnCl}_2 \cdot 4\text{H}_2\text{O}$  99% Sigma Aldrich), Potassium permanganate ( $\text{KMnO}_4$ , 99.0 %), Sigma Aldrich), Iridium oxide ( $\text{IrO}_2$ , 99%, Sigma Aldrich), Pt/C (Sigma Aldrich), Sodium chloride ( $\text{NaCl}$ , Sigma Aldrich), Sulfuric acid ( $\text{H}_2\text{SO}_4 \geq 98\%$ , Sigma Aldrich), Potassium hydroxide ( $\text{KOH}$ ,  $\geq 95\%$ , Sigma-Aldrich), Sodium hydroxide ( $\text{NaOH}$ ,  $\geq 95\%$ , Sigma-Aldrich), Hydrochloric acid ( $\text{HCl}$ , 37 %, Alfa Aesar), Ethanol ( $\text{C}_2\text{H}_5\text{OH}$ ,  $\geq 98\%$ , Sigma Aldrich), Methanol ( $\text{CH}_3\text{OH}$ ,  $\geq 98\%$ , Sigma Aldrich), Isopropanol ( $\geq 98\%$ , Sigma Aldrich). Milli-Q ultrapure water with resistance of  $18 \text{ M } \Omega \text{ cm}^{-1}$  was used throughout this study.

## Synthesis of $\text{MnO}_x$ and $\text{CaMnO}_x$

$\text{MnO}_x$  nanorods were synthesized through hydrothermal techniques. To prepare the required solutions, 0.05 M  $\text{KMnO}_4$  and 0.2 M  $\text{MnCl}_2 \cdot 4\text{H}_2\text{O}$  were dissolved in deionized water. The synthesis process involved gradually combining 30 mL of  $\text{KMnO}_4$  solution with 30 mL of  $\text{MnCl}_2 \cdot 4\text{H}_2\text{O}$  solution. The addition of hydrochloric acid ( $\text{HCl}$ ) adjusted the pH to 2, and the resulting solution was further diluted with deionized water to a total volume of 75 mL. This solution was then placed in a Teflon Lined Hydrothermal Autoclave (150 mL) for hydrothermal treatment at  $180^\circ\text{C}$  for 18 hours, promoting the formation and growth of  $\text{MnO}_x$  nanorods.

Similarly,  $\text{CaMnO}_x$  nanorods were fabricated using the same synthesis approach. Solutions of 0.05 M  $\text{KMnO}_4$ , 0.2 M  $\text{MnCl}_2 \cdot 4\text{H}_2\text{O}$ , and 0.25 M  $\text{Ca}(\text{NO}_3)_2 \cdot 4\text{H}_2\text{O}$  were prepared with deionized water. In the synthesis process, 20 mL of  $\text{KMnO}_4$  solution and 20 mL of  $\text{Ca}(\text{NO}_3)_2 \cdot 4\text{H}_2\text{O}$  solution were combined, and subsequent additions of  $\text{KOH}$  were made until the pH reached 14. After cooling to room temperature, 20 mL of  $\text{MnCl}_2 \cdot 4\text{H}_2\text{O}$  solution was added dropwise. The resulting solution was diluted with deionized water to a total volume of 75 mL and transferred to a Teflon Lined Hydrothermal Autoclave (150 mL) for hydrothermal treatment at  $180^\circ\text{C}$  for 18 hours, facilitating the formation and growth of  $\text{CaMnO}_x$  nanorods. Both samples underwent thorough washing with deionized water and ethanol and were subsequently dried in an oven at  $65^\circ\text{C}$  for 12 hours.

## Structural and Chemical Characterization

The crystal phase of all prepared materials was determined using a Bruker D8 Advance diffractometer with  $\text{Cu K}\alpha$  radiation ( $\lambda = 1.54056 \text{ \AA}$ ) as the X-ray source in the  $2\theta$  range of  $05^\circ$ –

90°. Scanning Electron Microscopy (SEM) analysis, conducted with a Thermo Fischer NOVA Nano SEM 450-FEISEM and Energy Dispersive Spectrometer (Oxford Instruments, UK), was employed to investigate the surface structure and composition of the materials. Raman spectra were obtained using an InVia Raman Microscope-Renishaw with a wavelength of 514 nm. X-ray Photoelectron Spectroscopy (XPS) studies were performed using a Kratos X-ray Photoelectron Spectrometer–Axis Ultra DLD with an Al mono (K-alpha) source operated at 15 keV and 15 mA to study the chemical structure of the materials.

### **Electrochemical Characterizations**

Electrochemical measurements of these as-prepared catalysts were performed on a Gamry Reference 3000 electrochemical station using a three-electrode setup. The as prepared catalyst, Hg/HgO and graphite rod were used as working, reference, and counter electrodes, respectively. The cyclic polarization curve of each catalyst was conducted at low scan rate (1 mV/s) with 10 % iR compensation. Initially 20 cycles were performed for each catalyst to stabilize the active sites. All the potentials were calibrated to the reversible hydrogen electrode using the equation:  $E_{RHE} = E_{Hg/HgO} + 0.098 V + 0.059 PH$ . The Tafel slope was determined by  $\eta = a + b \log(j)$ , where  $j$  represents the current density. The electrochemical impedance spectroscopy (EIS) calculations were completed under similar conditions at an overpotential near to-onset potential from  $10^6$  to  $10^{-1}$  Hz with an A.C voltage of 5 mV/s.

### **Electrochemical active surface area (ECSA)**

The electrochemically active surface area was calculated following a standard formula:  $ECSA = R_f * S$ , where  $S$  denotes the real surface area of the smooth electrode, equivalent to the geometric area of the working electrode (in our case  $S = 1 \text{ cm}^2$ ).<sup>1</sup>

$$ECSA = R_f S$$

The roughness factor ( $R_f$ ) was determined using the following equation.

$$R_f = \frac{C_{dl}}{C_s}$$

Here,  $C_{dl}$  represents the double-layer capacitance, obtained from the slope of the double-layer charging current versus the scan rate using the equation.

$$i_c = vC_{dl}$$

where  $C_s$  is the specific capacitance of a sample under the specific condition of electrolyte and  $C_{dl}$  is the double-layer capacitance in the non-faradic region of the voltammogram.  $C_s$ , denoting the general specific capacitance, represents the average double-layer capacitance of a smooth material surface, typically ranging from 20 to 40  $\mu\text{Fcm}^{-2}$ . Hence, we chose an average value (0.040 mF) to get the average value of ECSA of our catalyst.

### Exchange current density from EIS

$$\text{Exchange current density (I}_{ex}) = \frac{RT}{nF\theta}$$

R = Gas constant (8.314 J/ K. mol)

T = Reaction temperature

n = Number of electrons transfer (4)

$\theta$  = Charge transfer resistance calculated from the EIS.

#### CaMnO<sub>x</sub>-Ni(OH)<sub>2</sub>

$$\frac{8.314 \text{ J/K. mol} * 298 \text{ K}}{4 * 96485 \text{ Cmol}^{-1} * 8.0 \Omega * 1 \text{ cm}^2}$$

$$= 0.79 \text{ mA/cm}^2$$

#### MnO<sub>x</sub>-Ni(OH)<sub>2</sub>

$$\frac{8.314 \text{ J/K. mol} * 298 \text{ K}}{4 * 96485 \text{ Cmol}^{-1} * 16.1 \Omega * 1 \text{ cm}^2}$$

$$= 0.22/\text{cm}^2$$

#### Ni(OH)<sub>2</sub>

$$\frac{8.314 \text{ J/K. mol} * 298 \text{ K}}{4 * 96485 \text{ Cmol}^{-1} * 24.9 \Omega * 1 \text{ cm}^2}$$

$$= 0.12 \text{ mAcm}^2$$

### Determination of TOF from the integrated OER polarization curve

$$TOF = \frac{i \times N_A}{A \times F \times n \times r}$$

Were,

$i$  = current in Ampere

$N_A$  = Avogadro number

$A$  = Geometrical surface area of the electrode

$F$  = Faraday constant

$n$  = Number of electrons

$r$  = Surface concentration of atoms

### TOF of synthesized catalyst for OER

#### OER @1.6 V vs RHE

$$\begin{aligned} \text{CaMnO}_x\text{-Ni(OH)}_2 &= \frac{0.5A \times 6.022 \times 10^{23} \text{ atom}}{1\text{cm}^2 \times 96485C \times 4 * 4.9 \times 10^{15} \text{ atoms}} \\ &= 160 \text{ s}^{-1} \end{aligned}$$

$$\begin{aligned} \text{MnO}_x\text{-Ni(OH)}_2 &= \frac{0.3A \times 6.022 \times 10^{23} \text{ atom}}{1\text{cm}^2 \times 96485C \times 4 * 5.2 \times 10^{15} \text{ atoms}} \\ &= 90 \text{ s}^{-1} \end{aligned}$$

$$\begin{aligned} \text{Ni(OH)}_2 &= \frac{0.15A \times 6.022 \times 10^{23} \text{ atom}}{1\text{cm}^2 \times 96485C \times 4 * 7.3 \times 10^{15} \text{ atoms}} \\ &= 32 \text{ s}^{-1} \end{aligned}$$

### Faradic efficiency

The water displacement method was used for the quantification of molecular O<sub>2</sub>. The ideal gas equation was used for the quantitative analysis, where we assumed that all the electrons in the external circuit are generated during OER process which can later reduce the protons. In this set-up, electrochemical airtight cell was connected with the graduated burette filled with water. Initially, the cell was purged with nitrogen for 15 minutes followed by chronopotentiometry experiments, while noting the initial volume. The reduction in the water volume was observed

directly linked with increase in the volume of gas in the head space of the burette. The measured volume was then converted into faradic efficiency by comparing with theoretical yield using the formula.

$$\text{Faradaic efficiency} = V_{\text{experimental}} / V_{\text{Theoretical}}$$

While

$$V_{\text{Theoretical for O}_2} = 1/4 * Q/F * V_m$$

The number 1 means 1 mole of O<sub>2</sub> per mole of H<sub>2</sub>O and 4 means 4 moles of electrons per mole of H<sub>2</sub>O.

$$V_{\text{Theoretical for H}_2} = 1/2 * Q/F * V_m$$

The number 1 means 1 mole of O<sub>2</sub> per mole of H<sub>2</sub>O and 2 means 2 moles of electrons per mole of H<sub>2</sub>O.

Q= It (amount of charged passed through electrode)

F = Faraday constant (96485 C mol<sup>-1</sup>)

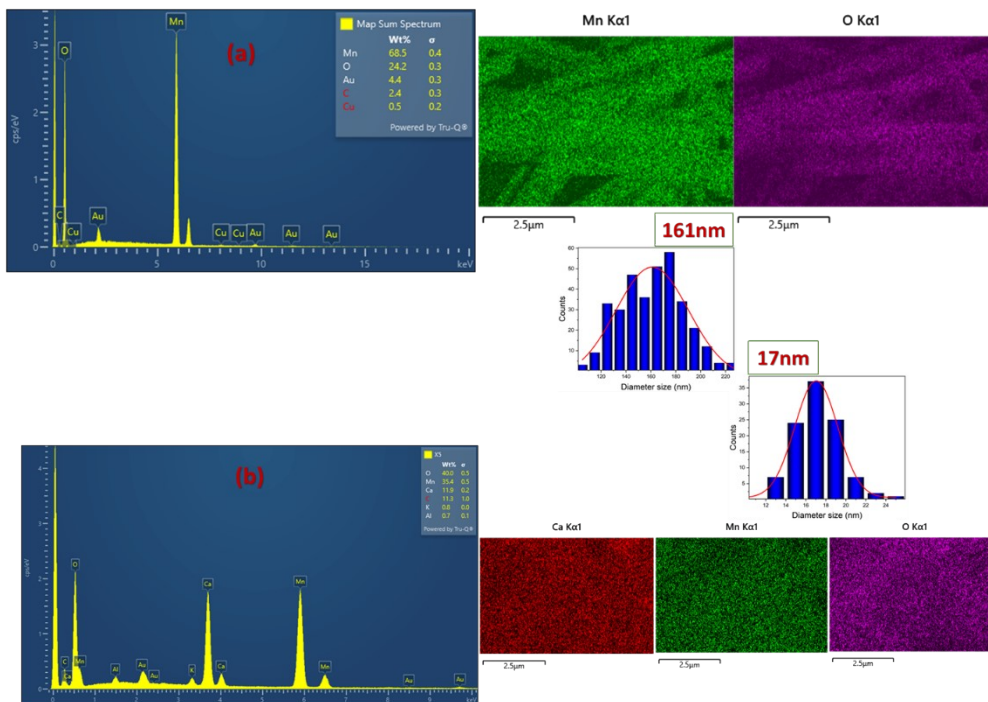

**Figure S1.** (a) EDX spectrum and nanorods distribution of (a) MnO<sub>x</sub> and (b) CaMnO<sub>x</sub> nanorods

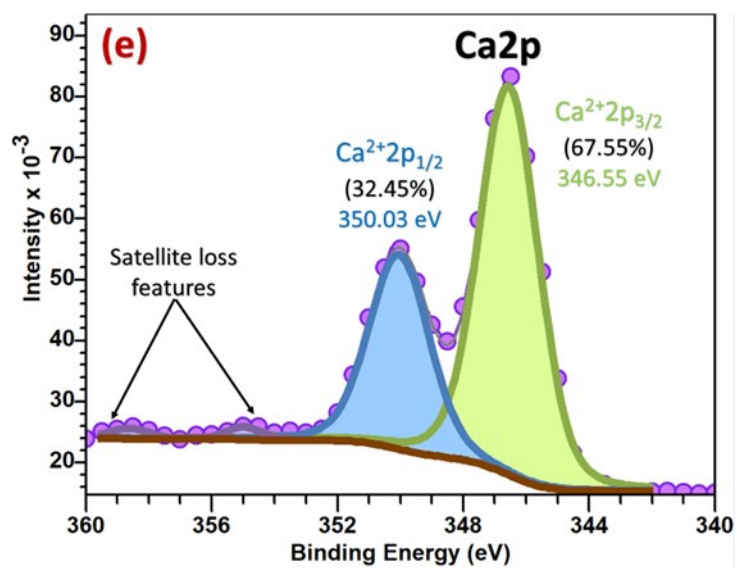

**Figure S3.** High resolution XPS spectrum of Ca2p for CaMnO<sub>x</sub> nanorods

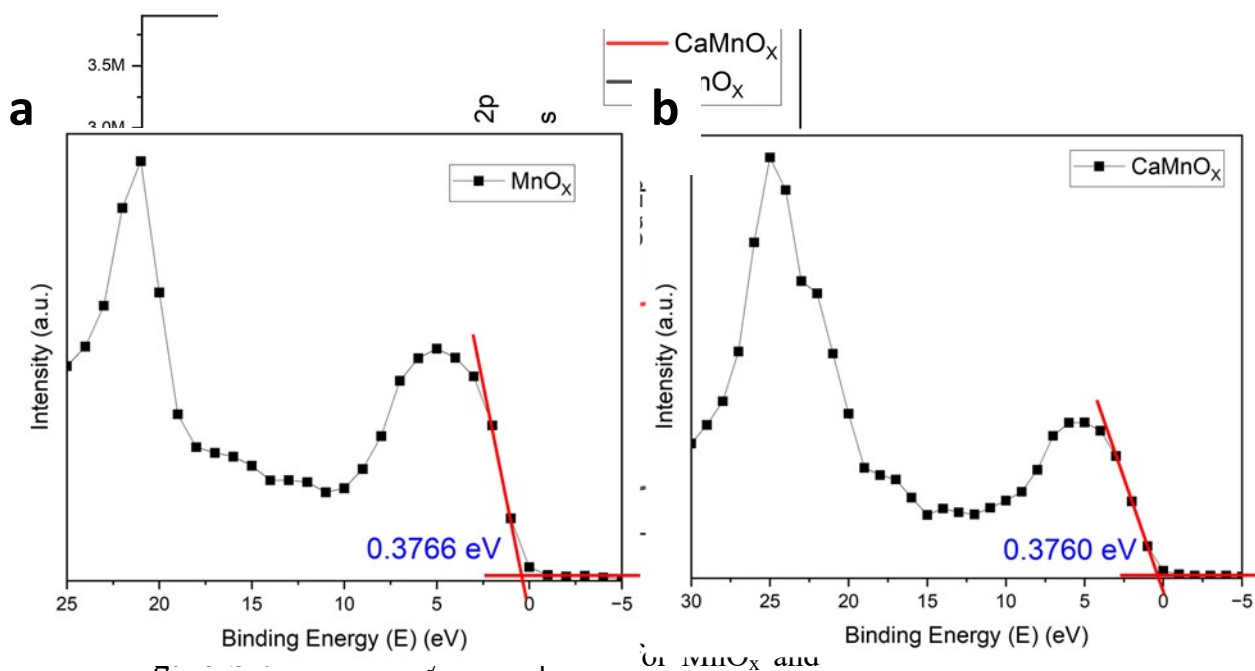

**Figure S4.** Valence band spectra MnO<sub>x</sub> and CaMnO<sub>x</sub> nanorods.





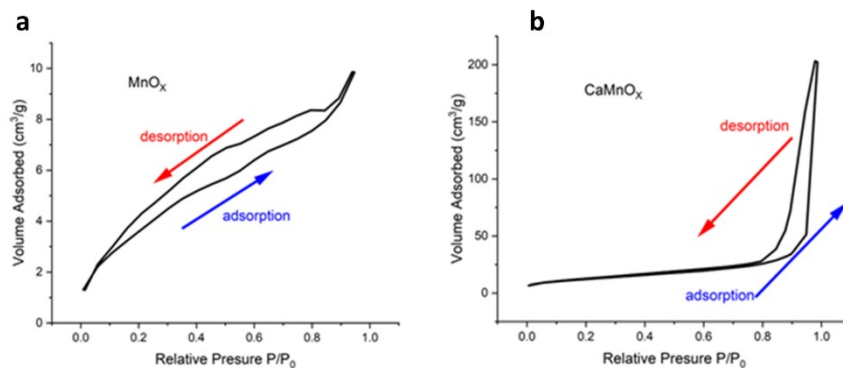

**Figure S5.** BET analysis of  $\text{MnO}_x$  and  $\text{CaMnO}_x$

**BET analysis of  $\text{CaMnO}_x$**

Weight=0.0322 g

Description Analysis

Molecular Weight 28.0134 g

Cross Section Area 16.2 Å<sup>2</sup>/molec

Bath Temperature 77.35 K

Isotherm Branch Adsorption

Slope 79.8819

Intercept 0.600856

Correlation coeff., r 0.999727

C constant 133.947

Surface area 43.270 m<sup>2</sup>/g

**Table - BET Multi-point BET.**

| Relative Pressure | Volume Adsorbed cc/g | 1 / [ W((P/Po) - 1) ] @STP |
|-------------------|----------------------|----------------------------|
| 0.05494           | 9.12667              | 5.0967                     |
| 0.10757           | 10.3364              | 9.3304                     |
| 0.11767           | 10.5808              | 10.0847                    |
| 0.15739           | 11.3633              | 13.1521                    |
| 0.20375           | 12.2413              | 16.725                     |
| 0.22762           | 12.6962              | 18.5717                    |
| 0.2548            | 13.2407              | 20.6621                    |
| 0.30338           | 14.0762              | 24.7549                    |
| 0.33578           | 14.7048              | 27.506                     |
| 0.35452           | 15.0144              | 29.2683                    |

**BET analysis of  $\text{MnO}_x$**

Weight 0.0331 g

Description Analysis

Molecular Weight 28.013g

Cross Section Area 16.2 Å<sup>2</sup>/mol

Bath Temperature 77.35 K

Isotherm Branch Adsorption

Slope 222.738

Intercept 10.5694

Correlation coeff., r 0.999481

C constant 22.0737

Surface area 14.927 m<sup>2</sup>/g

**Table - BET Multi-point BET.**

| Relative Pressure | Volume Adsorbed cc/g | 1 / [ W((P/Po) - 1) ] @STP |
|-------------------|----------------------|----------------------------|
| 0.05838           | 2.21627              | 22.3821                    |
| 0.10813           | 2.75687              | 35.1855                    |
| 0.15527           | 3.18913              | 46.114                     |
| 0.20698           | 3.64969              | 57.2179                    |
| 0.25652           | 4.086                | 67.5603                    |
| 0.30423           | 4.50818              | 77.6034                    |
| 0.35208           | 4.88435              | 89.014                     |

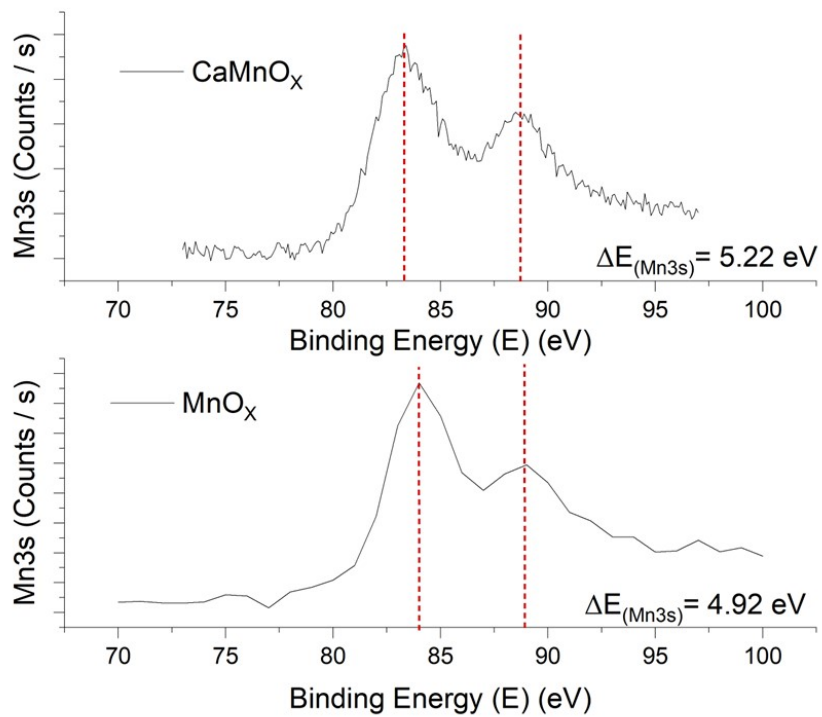

**Figure S6.** Mn 3s XPS spectra of MnO<sub>x</sub> and CaMnO<sub>x</sub> nanorods

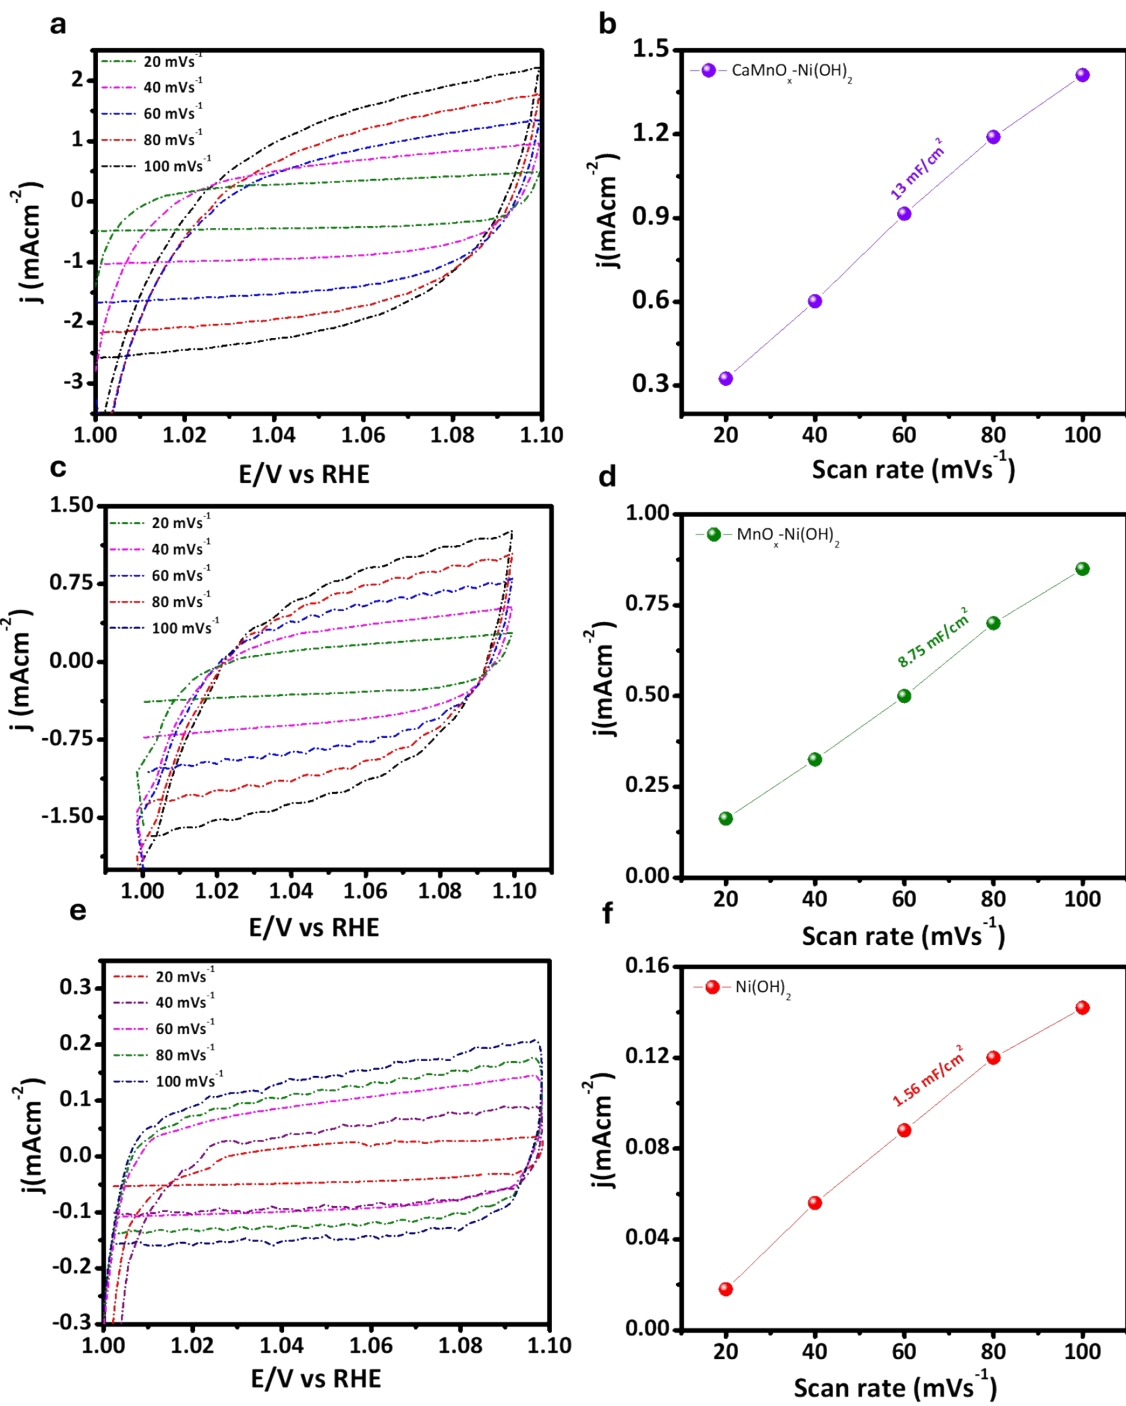

**Figure S7** Static cyclic voltammetry curves at 20, 40, 60, 80 and 100 Vs<sup>-1</sup> and dependence of double layer charging current vs. scan rate plots of (a,b).CaMnO<sub>x</sub>-Ni(OH)<sub>2</sub>, (c,d) MnO<sub>x</sub>- Ni(OH)<sub>2</sub> and (e,f) Ni(OH)<sub>2</sub>,

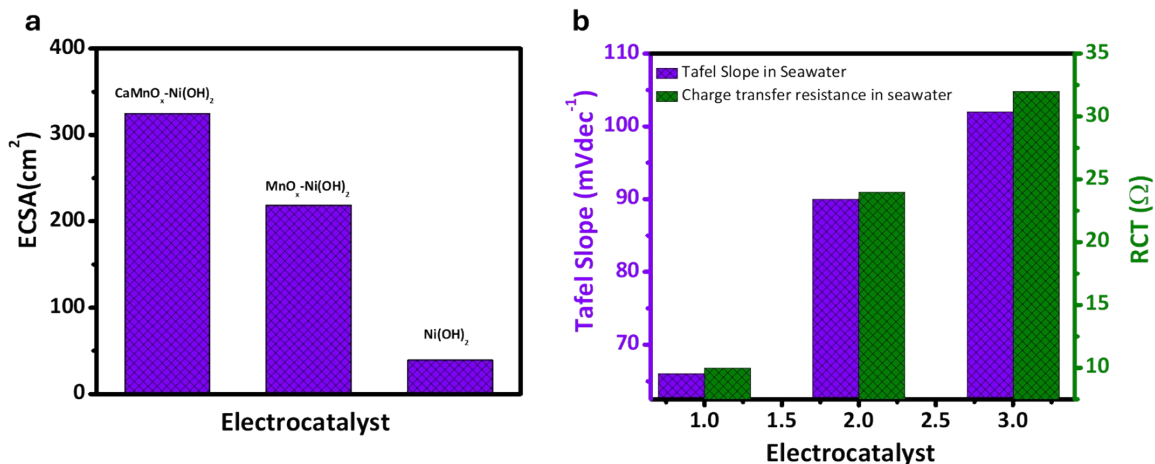

**Figure S8.** (a) Electrochemical active surface area, (b) Tafel slope and charge transfer resistance of CaMnO<sub>x</sub>, MnO<sub>x</sub>, Ni(OH)<sub>2</sub> in alkaline seawater

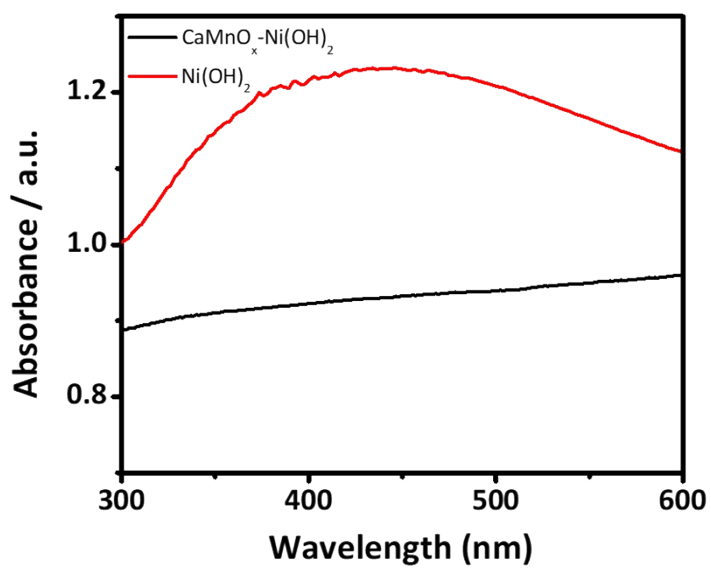

**Figure S9.** (a) SEM image and (b) EDS spectrum of CaMnO<sub>x</sub>-Ni(OH)<sub>2</sub> after seawater electrolysis.

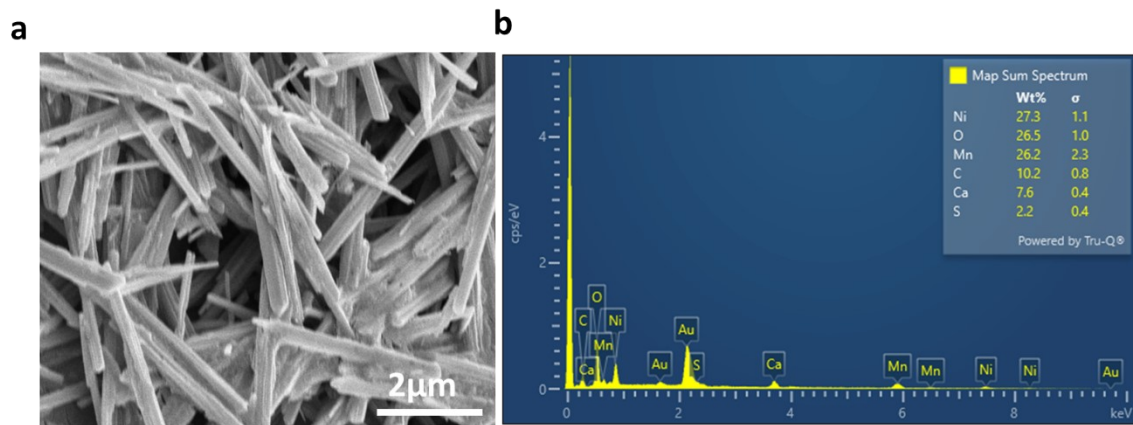

**Figure S9.** (a) SEM image and (b) EDS spectrum of  $\text{CaMnO}_x\text{-Ni(OH)}_2$  after seawater electrolysis.

**Table S1.** Quantitative analysis of  $\text{MnO}_x$  and  $\text{CaMnO}_x$  nanorods

| Samples            | Surface Area (m <sup>2</sup> /g) | Total Pore Volume (cc/g) | Ratio Mn <sup>3+</sup> /Mn <sup>4+</sup> | Ratio O <sub>ads</sub> /O <sub>latt</sub> | AOS   | VB-XPS |
|--------------------|----------------------------------|--------------------------|------------------------------------------|-------------------------------------------|-------|--------|
| MnO <sub>x</sub>   | 14.927                           | 0.01257                  | 0.09                                     | 0.425                                     | 3.416 | 0.3766 |
| CaMnO <sub>x</sub> | 43.270                           | 0.3138                   | 0.41                                     | 1.254                                     | 3.078 | 0.3760 |

**Table S2. Comparison of the OER activity between  $\text{CaMnO}_x\text{-Ni(OH)}_2$  and other previously reported catalysts in alkaline and alkaline sea water electrolytes.**

| Electrocatalyst                                                                 | $\eta@10\text{mAcm}^{-2}$<br>(mV) | Tafel slope<br>(mVdec <sup>-1</sup> ) | Electrolyte      | References |
|---------------------------------------------------------------------------------|-----------------------------------|---------------------------------------|------------------|------------|
| $\text{CaMnO}_x\text{-Ni(OH)}_2$                                                | 260                               | 63                                    | 1M KOH           | This Work  |
| Ni-CO@NC<br>(N-doped carbon<br>nanofiber)                                       | 530                               | 98                                    | 1 M KOH          | 2          |
| Ni/ Ni (OH) <sub>2</sub>                                                        | 403                               | 74.8                                  | 1M KOH           | 3          |
| K1-<br>xNax(MgMnFeCoNi)F3                                                       | 300                               | 55                                    | 1M KOH           | 4          |
| $\text{CaMnO}_x\text{-Ni(OH)}_2$                                                | 280                               | 65                                    | 1M KOH Seawater  | This Work  |
| Ni-Mo-N @NiFeN                                                                  | 286                               | 58.6                                  | 1M KOH seawater  | 5          |
| B-Co <sub>2</sub> Fe LDH                                                        | 245                               | 63.8                                  | 1M KOH seawater  | 6          |
| Ni <sub>2</sub> P/Fe <sub>2</sub> P/NF                                          | 220                               | 86                                    | 1M KOH seawater  | 7          |
| Co-Fe <sub>2</sub> P                                                            | 250                               | 45                                    | 1M KOH seawater  | 8          |
| Na <sub>2</sub> Co <sub>1-x</sub> Fe <sub>x</sub> P <sub>2</sub> O <sub>7</sub> | 280                               | 53                                    | 1M KOH+0.5M NaCl | 9          |

## References

- 1 C. C. L. McCrory, S. Jung, J. C. Peters and T. F. Jaramillo, *J. Am. Chem. Soc.*, 2013, **135**, 16977–16987.
- 2 Y. Fu, H. Y. Yu, C. Jiang, T. H. Zhang, R. Zhan, X. Li, J. F. Li, J. H. Tian and R. Yang, *Adv. Funct. Mater.*, , DOI:10.1002/adfm.201705094.
- 3 D. Lim, S. Kim, N. Kim, E. Oh, S. E. Shim and S. H. Baeck, *ACS Sustain. Chem. Eng.*, 2020, **8**, 4431–4439.
- 4 T. Wang, H. Chen, Z. Yang, J. Liang and S. Dai, *J. Am. Chem. Soc.*, 2020, **142**, 4550–4554.
- 5 L. Yu, Q. Zhu, S. Song, B. McElhenny, D. Wang, C. Wu, Z. Qin, J. Bao, Y. Yu, S. Chen and Z. Ren, *Nat. Commun.*, 2019, **10**, 1–10.
- 6 L. Wu, L. Yu, Q. Zhu, B. McElhenny, F. Zhang, C. Wu, X. Xing, J. Bao, S. Chen and Z. Ren, *Nano Energy*, 2021, **83**, 105838.
- 7 L. Wu, L. Yu, F. Zhang, B. McElhenny, D. Luo, A. Karim, S. Chen and Z. Ren, *Adv. Funct. Mater.*, 2021, **31**, 1–12.
- 8 S. Wang, P. Yang, X. Sun, H. Xing, J. Hu, P. Chen, Z. Cui, W. Zhu and Z. Ma, *Appl. Catal. B Environ.*, 2021, **297**, 120386.
- 9 H. J. Song, H. Yoon, B. Ju, D. Y. Lee and D. W. Kim, *ACS Catal.*, , DOI:10.1021/acscatal.9b04231.
